# Supplementary material for: Genetic variation and population structure of Botswana populations as identified with AmpFLSTR Identifiler short tandem repeat (STR) loci
Source: PubMed Central journal article supplement (PMC5533702; doi:10.1038/s41598-017-06365-y), 2017-07-28
Supplement: 41598_2017_6365_MOESM1_ESM.pdf [file 41598_2017_6365_MOESM1_ESM.pdf]

# Genetic variation and population structure of Botswana populations as identified with AmpFLSTR Identifiler short tandem repeat (STR) loci

**Authors:** Tiroyamodimo Tau, Anthony Wally, Thokozile Patricia Fanie, Goitseone Lorato Ngono, Senungogo Wata Mpoloka, Sean Davison, María Eugenia D’Amato

## Supplementary Information

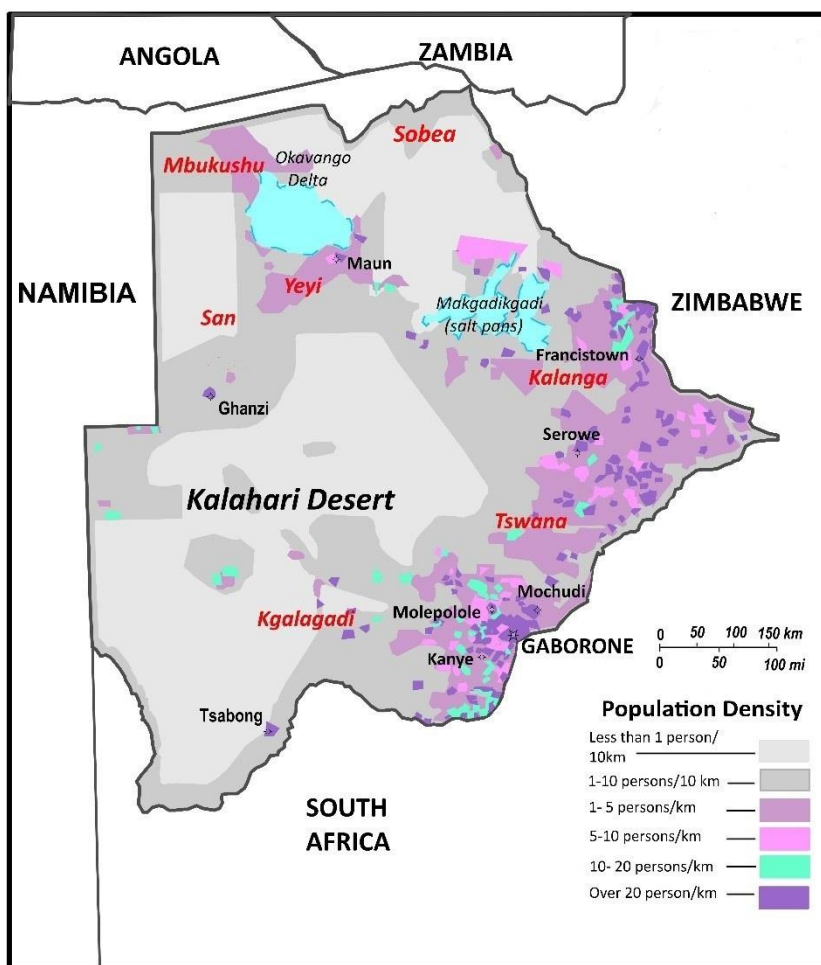

**Supplementary Figure S1** Representation of the geographic locations of the different ethno-linguistic language groups used in the study. The Niger-Congo Bantoid branch (Bantu) being: Central S-Bantu-Kgalagadi, Tswana and Kalanga; Central K-Bantu- Yeyi; and Central R-Bantu- Mbukushu. The Khoisan (San) are also seen in the picture. Map adapted from [http://www.lib.utexas.edu/maps/africa/botswana-population\\_density-2005.png](http://www.lib.utexas.edu/maps/africa/botswana-population_density-2005.png) (Courtesy of the University of Texas Libraries, The University of Texas at Austin) using Surfer 9 (<http://www.ssg-surfer.com>).

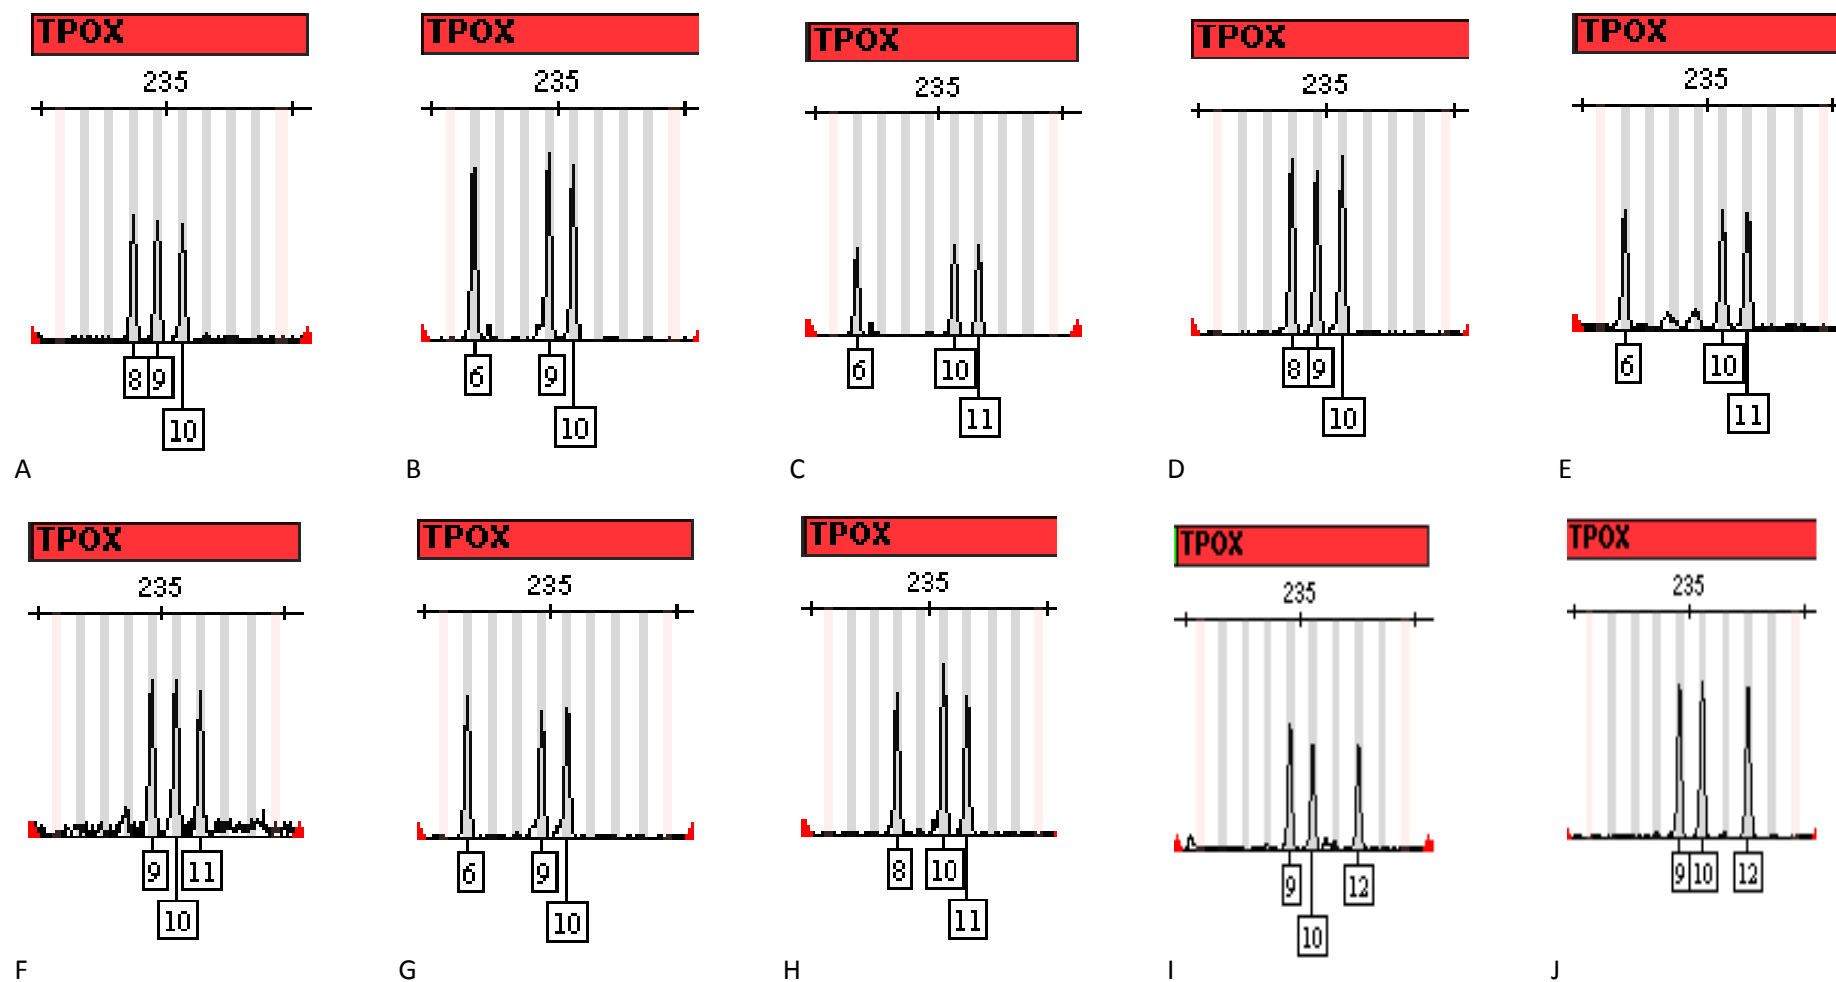

Supplementary Figure S2 Electropherograms for samples exhibiting tri-allelic patterns for TPOX. Male samples are D and E.

**Supplementary Table S1** Rare “variant” and off-ladder variants observed in Botswana with the Identifiler kit. Off-ladder variants marked with an \*. Allele counts in this report are shown along with NIST number of records and publications for African populations along with their reported frequencies in brackets. See Supplementary Table S2 for allele frequencies reported in the study.

| Allele                                                                         | Current Study   |                 |                 |                    |              |             |                    | NIST STR variant database<br>( <a href="http://www.cstl.nist.gov/strbase/var_tab.htm">http://www.cstl.nist.gov/strbase/var_tab.htm</a> ) | African Published data                                                     |         |                                           |
|--------------------------------------------------------------------------------|-----------------|-----------------|-----------------|--------------------|--------------|-------------|--------------------|------------------------------------------------------------------------------------------------------------------------------------------|----------------------------------------------------------------------------|---------|-------------------------------------------|
|                                                                                | Bantu Central K | Bantu Central R | Bantu Central S | Khoisan Khoe-Kwadi | Khoisan Kx'a | Khoisan Tuu | Undeclared Khoisan |                                                                                                                                          | South African                                                              | Namibia | African                                   |
| <b>D21S11 - tetranucleotide repeat ([TCTA] [TCTG])</b>                         |                 |                 |                 |                    |              |             |                    |                                                                                                                                          |                                                                            |         |                                           |
| 24.3*                                                                          |                 |                 | 3               | 1                  |              |             |                    | 36 reports                                                                                                                               |                                                                            |         |                                           |
| 33.1*                                                                          |                 |                 | 10              |                    |              |             |                    | 86 reports                                                                                                                               | [2]Zulu (0.0102), [6] Bantu (0.0022 – 0.0120), [7] (Bantu 0.0039)          |         | [4] Gabon (0.014), [5] Mozambique (0.004) |
| 34.1*                                                                          |                 |                 | 6               | 3                  |              |             |                    | 21 reports                                                                                                                               | [1] Coloured (0.0100), [2]Xhosa (0.0042)                                   |         |                                           |
| 35.1*                                                                          | 1               | 1               | 1               | 3                  | 4            |             |                    | 19 reports                                                                                                                               | [1] Coloured (0.0150), Bantu (0.0100), [2]Zulu (0.0051), Coloured (0.0090) |         |                                           |
| 36.1*                                                                          |                 |                 | 1               |                    |              |             |                    | 6 reports                                                                                                                                | [1] Coloured (0.0210)                                                      |         |                                           |
| 37.1*                                                                          |                 |                 | 1               |                    |              |             |                    | 1 report                                                                                                                                 |                                                                            |         |                                           |
| 39                                                                             |                 |                 | 3               |                    | 1            |             |                    | 1 report                                                                                                                                 | [1] Coloured (0.0050)                                                      |         |                                           |
| <b>D7S820 - Tetranucleotide repeat (GATA)</b>                                  |                 |                 |                 |                    |              |             |                    |                                                                                                                                          |                                                                            |         |                                           |
| 5                                                                              |                 |                 |                 |                    | 3            |             |                    | 1 report                                                                                                                                 |                                                                            |         |                                           |
| <b>FGA - complex Tetranucleotide repeat ([TTTC]3TTTTTCT[CTTT]nCTCC[TTCC]2)</b> |                 |                 |                 |                    |              |             |                    |                                                                                                                                          |                                                                            |         |                                           |

|                                                                        |   |   |    |    |   |   |   |            |                                                                             |                   |                                                                                                                |
|------------------------------------------------------------------------|---|---|----|----|---|---|---|------------|-----------------------------------------------------------------------------|-------------------|----------------------------------------------------------------------------------------------------------------|
| 16                                                                     |   |   | 2  |    |   |   |   | 8 reports  |                                                                             |                   |                                                                                                                |
| 18.2                                                                   |   | 2 | 8  | 1  |   |   |   | 10 reports | [2] Xhosa (0.0042)                                                          |                   | [4] Gabon (0.005), [5] Mozambique (0.0292), [8] Mozambique (0.010), [9] Angolan (0.0146)                       |
| 19.2                                                                   |   |   | 9  | 1  |   |   |   | 7 reports  | [1] Bantu (0.0100), [2] Xhosa (0.0168), Zulu (0.0051)                       |                   | [3] African (0.0050), [4] Gabon (0.005), [5] Mozambique (0.010), [8] Mozambique (0.0292), [9] Angolan (0.0010) |
| 21.2                                                                   |   |   | 8  | 1  |   |   |   | 8 reports  | [1] Coloured (0.0210), [2] Coloured (0.0045), Xhosa (0.0042), Zulu (0.0051) |                   |                                                                                                                |
| 22.2                                                                   | 1 |   | 1  |    |   |   |   | 19 reports | [1] Coloured (0.0150) [2] Coloured (0.0045), Xhosa (0.0042), Zulu (0.0051)  |                   | [3] African (0.0100)                                                                                           |
| 25.2                                                                   |   |   |    | 1  |   |   |   | 9 reports  | [2] San (0.007)                                                             |                   |                                                                                                                |
| 29.2                                                                   |   |   | 1  |    |   |   |   | 3 reports  | [2] Xhosa (0.0042)                                                          |                   | [5] Mozambique (0.003)                                                                                         |
| <b>CSF1PO- Tetranucleotide repeat (AGAT)</b>                           |   |   |    |    |   |   |   |            |                                                                             |                   |                                                                                                                |
| 16                                                                     |   |   |    |    |   | 1 |   | 6 reports  |                                                                             |                   |                                                                                                                |
| <b>D16S539- Tetranucleotide repeat (GATA)</b>                          |   |   |    |    |   |   |   |            |                                                                             |                   |                                                                                                                |
| 17*                                                                    |   |   |    |    | 1 |   |   | 1 report   |                                                                             |                   |                                                                                                                |
| <b>D19S433- Tetranucleotide repeat (AAGG)(AAAG)(AAGG)(TAGG)[AAGG]n</b> |   |   |    |    |   |   |   |            |                                                                             |                   |                                                                                                                |
| 7                                                                      |   | 4 | 30 | 10 | 5 |   | 1 | 5 reports  | [1] Coloured (0.0520), Bantu (0.0500), [2] Coloured (0.0225)                | [1] Khoe (0.0190) |                                                                                                                |
| <b>D18S51- Tetranucleotide repeat (GAAA)</b>                           |   |   |    |    |   |   |   |            |                                                                             |                   |                                                                                                                |
| 15.2                                                                   |   |   | 7  | 10 | 2 | 1 |   | 22 reports | [1] Coloured (0.0310), Bantu (0.0100), [2] Xhosa (0.0126), Zulu (0.0051)    | [1] Khoe (0.0380) | [3] African (0.0030), [8] Mozambique (0.0033), [9] Angolan (0.0021)                                            |
| 18.2                                                                   |   |   | 1  |    |   |   |   | 5 reports  |                                                                             |                   | [3] African (0.0050)                                                                                           |

|      |   |  |   |  |  |  |  |            |                   |  |                      |
|------|---|--|---|--|--|--|--|------------|-------------------|--|----------------------|
| 19.2 | 1 |  | 3 |  |  |  |  | 3 reports  | [2] Zulu (0.0051) |  | [3] African (0.0030) |
| 21.1 |   |  | 1 |  |  |  |  | 3 reports  |                   |  |                      |
| 21.2 |   |  | 1 |  |  |  |  | 13 reports | [2] Zulu (0.0153) |  | [9] Angolan (0.0010) |

1. Schlebusch, C.M., Soodyall, H. & Jakobsson, M. Genetic variation of 15 autosomal STR loci in various populations from southern Africa. *Forensic Science International: Genetics* 6, e20-e21 (2012).
2. Ristow, P.G. & Cloete, K.W. GlobalFiler® Express DNA amplification kit in South Africa: Extracting the past from the present. *Forensic Science International: Genetics* (2016).
3. Phillips, C. et al. Analysis of global variability in 15 established and 5 new European Standard Set (ESS) STRs using the CEPH human genome diversity panel. *Forensic Science International: Genetics* 5, 155-169 (2011).
4. Steinlechner, M., Schmidt, K., Kraft, H., Utermann, G. & Parson, W. Gabon black population data on the ten short tandem repeat loci D3S1358, VWA, D16S539, D2S1338, D8S1179, D21S11, D18S51, D19S433, TH01 and FGA. *International journal of legal medicine* 116, 176-178 (2002).
5. Alves, C.n., Gusmão, L., Damasceno, A., Soares, B. & Amorim, A. Contribution for an African autosomic STR database (AmpF/STR Identifiler and Powerplex 16 System) and a report on genotypic variations. *Forensic science international* 139, 201-205 (2004).
6. Lane, A. et al. Genetic substructure in South African Bantu-speakers: Evidence from autosomal DNA and Y-chromosome studies. *American journal of physical anthropology* 119, 175-185 (2002).
7. Lucassen, A., Ehlers, K., Grobler, P.J. & Shezi, A.L. Allele frequency data of 15 autosomal STR loci in four major population groups of South Africa. *International journal of legal medicine* 128, 275-276 (2014).
8. A.C. Semo, Estudo Genético-Populacional dos Principais Grupos de Moçambique-Aplicação Forense, UNIVERSIDADE DA BEIRA INTERIOR, 2013.
9. Melo, M.M. et al. Genetic study of 15 STRs loci of Identifiler system in Angola population. *Forensic Science International: Genetics* 4, e153-e157 (2010).

**Supplementary Table S2** Allele frequencies and Forensic summary statistics for each of the 15 Identifier STR loci found in the Botswana samples (n=990).

| Allele | D8S1179 | D21S11 | D7S820 | CSF1PO | D3S1358 | TH01  | D13S317 | D16S539 | D2S1338 | D19S433 | vWA   | TPOX  | D18S51 | D5S818 | FGA   |
|--------|---------|--------|--------|--------|---------|-------|---------|---------|---------|---------|-------|-------|--------|--------|-------|
| 5      |         |        | 0.002  |        |         |       |         | 0.005   |         |         |       |       |        |        |       |
| 6      |         |        |        | 0.066  |         | 0.077 |         |         |         |         |       | 0.051 |        | 0.001  |       |
| 7      |         |        | 0.007  | 0.053  |         | 0.309 |         |         |         | 0.025   |       | 0.026 |        | 0.001  |       |
| 8      |         |        | 0.210  | 0.048  |         | 0.386 | 0.024   | 0.028   |         |         |       | 0.311 |        | 0.069  |       |
| 9      |         |        | 0.136  | 0.048  |         | 0.169 | 0.009   | 0.186   |         | 0.002   |       | 0.274 | 0.002  | 0.035  |       |
| 9,3    |         |        |        |        |         | 0.037 |         |         |         |         |       |       |        |        |       |
| 10     |         |        | 0.308  | 0.233  |         | 0.020 | 0.050   | 0.146   |         | 0.018   |       | 0.107 | 0.011  | 0.045  |       |
| 10,2   |         |        |        |        |         |       |         |         |         |         |       |       | 0.006  |        |       |
| 11     | 0.027   |        | 0.218  | 0.197  |         | 0.002 | 0.283   | 0.356   |         | 0.057   | 0.005 | 0.226 | 0.001  | 0.193  |       |
| 12     | 0.120   |        | 0.102  | 0.291  | 0.002   |       | 0.408   | 0.170   |         | 0.122   |       | 0.004 | 0.037  | 0.370  |       |
| 12,2   |         |        |        |        |         |       |         |         |         | 0.034   |       |       |        |        |       |
| 13     | 0.192   |        | 0.019  | 0.054  |         |       | 0.157   | 0.101   |         | 0.299   | 0.010 |       | 0.042  | 0.270  |       |
| 13,2   |         |        |        |        |         |       |         |         |         | 0.053   |       |       | 0.003  |        |       |
| 14     | 0.343   |        |        | 0.008  | 0.102   |       | 0.066   | 0.007   |         | 0.206   | 0.075 |       | 0.040  | 0.015  |       |
| 14,2   |         |        |        |        |         |       |         |         |         | 0.067   |       |       | 0.004  |        |       |
| 15     | 0.218   |        |        | 0.001  | 0.335   |       | 0.003   | 0.002   | 0.018   | 0.053   | 0.191 |       | 0.122  | 0.002  |       |
| 15,2   |         |        |        |        |         |       |         |         |         | 0.031   |       |       | 0.011  |        |       |
| 16     | 0.090   |        |        | 0.001  | 0.330   |       |         |         | 0.063   | 0.021   | 0.264 |       | 0.176  |        | 0.001 |
| 16,2   |         |        |        |        |         |       |         |         |         | 0.012   |       |       |        |        |       |
| 17     | 0.009   |        |        |        | 0.190   |       |         | 0.001   | 0.068   | 0.001   | 0.203 |       | 0.164  |        | 0.001 |
| 18     | 0.001   |        |        |        | 0.041   |       |         |         | 0.072   | 0.001   | 0.147 |       | 0.134  |        | 0.010 |
| 18,2   |         |        |        |        |         |       |         |         |         |         |       |       | 0.001  |        | 0.006 |
| 19     |         |        |        |        | 0.001   |       |         |         | 0.160   |         | 0.077 |       | 0.121  |        | 0.054 |
| 19,2   |         |        |        |        |         |       |         |         |         |         |       |       | 0.003  |        | 0.005 |
| 20     |         |        |        |        |         |       |         |         | 0.088   |         | 0.020 |       | 0.068  |        | 0.057 |

|      |  |       |  |  |  |  |  |  |       |  |       |  |       |  |       |
|------|--|-------|--|--|--|--|--|--|-------|--|-------|--|-------|--|-------|
| 21   |  |       |  |  |  |  |  |  | 0.175 |  | 0.005 |  | 0.026 |  | 0.091 |
| 21,1 |  |       |  |  |  |  |  |  |       |  |       |  | 0.001 |  |       |
| 21,2 |  |       |  |  |  |  |  |  |       |  |       |  | 0.001 |  | 0.005 |
| 22   |  |       |  |  |  |  |  |  | 0.158 |  | 0.002 |  | 0.017 |  | 0.169 |
| 22,2 |  |       |  |  |  |  |  |  |       |  |       |  |       |  | 0.002 |
| 23   |  |       |  |  |  |  |  |  | 0.076 |  | 0.001 |  | 0.005 |  | 0.181 |
| 24   |  |       |  |  |  |  |  |  | 0.045 |  |       |  | 0.001 |  | 0.185 |
| 24,2 |  | 0.002 |  |  |  |  |  |  | 0.001 |  |       |  |       |  |       |
| 24,3 |  | 0.002 |  |  |  |  |  |  |       |  |       |  |       |  |       |
| 25   |  | 0.001 |  |  |  |  |  |  | 0.052 |  |       |  | 0.004 |  | 0.102 |
| 25,2 |  |       |  |  |  |  |  |  |       |  |       |  |       |  | 0.001 |
| 26   |  | 0.003 |  |  |  |  |  |  | 0.020 |  |       |  | 0.002 |  | 0.068 |
| 27   |  | 0.064 |  |  |  |  |  |  | 0.005 |  |       |  | 0.001 |  | 0.019 |
| 28   |  | 0.231 |  |  |  |  |  |  | 0.001 |  |       |  |       |  | 0.016 |
| 29   |  | 0.132 |  |  |  |  |  |  |       |  |       |  |       |  | 0.009 |
| 29,2 |  | 0.001 |  |  |  |  |  |  |       |  |       |  |       |  | 0.001 |
| 30   |  | 0.138 |  |  |  |  |  |  |       |  |       |  |       |  | 0.002 |
| 30,2 |  | 0.008 |  |  |  |  |  |  |       |  |       |  |       |  | 0.004 |
| 31   |  | 0.077 |  |  |  |  |  |  |       |  |       |  |       |  |       |
| 31,2 |  | 0.072 |  |  |  |  |  |  |       |  |       |  |       |  | 0.005 |
| 32   |  | 0.020 |  |  |  |  |  |  |       |  |       |  |       |  |       |
| 32,2 |  | 0.082 |  |  |  |  |  |  |       |  |       |  |       |  | 0.002 |
| 33   |  | 0.017 |  |  |  |  |  |  |       |  |       |  |       |  |       |
| 33,1 |  | 0.006 |  |  |  |  |  |  |       |  |       |  |       |  |       |
| 33,2 |  | 0.034 |  |  |  |  |  |  |       |  |       |  |       |  |       |
| 33,3 |  | 0.001 |  |  |  |  |  |  |       |  |       |  |       |  |       |
| 34   |  | 0.024 |  |  |  |  |  |  |       |  |       |  |       |  |       |
| 34,1 |  | 0.005 |  |  |  |  |  |  |       |  |       |  |       |  |       |
| 34,2 |  | 0.008 |  |  |  |  |  |  |       |  |       |  |       |  |       |

|      |  |       |  |  |  |  |  |  |  |  |  |  |  |  |  |       |
|------|--|-------|--|--|--|--|--|--|--|--|--|--|--|--|--|-------|
| 35   |  | 0.034 |  |  |  |  |  |  |  |  |  |  |  |  |  |       |
| 35,1 |  | 0.006 |  |  |  |  |  |  |  |  |  |  |  |  |  |       |
| 35,2 |  | 0.002 |  |  |  |  |  |  |  |  |  |  |  |  |  |       |
| 36   |  | 0.011 |  |  |  |  |  |  |  |  |  |  |  |  |  |       |
| 36,1 |  | 0.001 |  |  |  |  |  |  |  |  |  |  |  |  |  |       |
| 37   |  | 0.012 |  |  |  |  |  |  |  |  |  |  |  |  |  |       |
| 37,1 |  | 0.001 |  |  |  |  |  |  |  |  |  |  |  |  |  |       |
| 38   |  | 0.008 |  |  |  |  |  |  |  |  |  |  |  |  |  |       |
| 39   |  | 0.002 |  |  |  |  |  |  |  |  |  |  |  |  |  |       |
| 42   |  |       |  |  |  |  |  |  |  |  |  |  |  |  |  | 0.001 |
| 42,2 |  |       |  |  |  |  |  |  |  |  |  |  |  |  |  | 0.007 |
| 43,2 |  |       |  |  |  |  |  |  |  |  |  |  |  |  |  | 0.002 |



**Supplementary Table S3** Genetic diversity estimators for the Botswana populations: overall (A), according to the Bantu (B-D) and Khoisan (E-G) ethno-linguistic groups, and according to districts (H-P), The Observed heterozygosity (Hobs), expected heterozygosity (Hexp) and probability of Hardy-Weinberg equilibrium (HWE *P*). Hobs= observed heterozygosity. Significant *p* values ( $P < 0,0033$ ) are in bold. Values out of HWE that show Heterozygote deficiency indicated by an asterisk (\*).

|                | A                          |        |                | B                      |        |              | C                      |        |               | D                       |        |              |
|----------------|----------------------------|--------|----------------|------------------------|--------|--------------|------------------------|--------|---------------|-------------------------|--------|--------------|
|                | Overall population (n=990) |        |                | Bantu Central K (n=43) |        |              | Bantu Central R (n=58) |        |               | Bantu Central S (n=646) |        |              |
| Locus          | Hobs                       | Hexp   | HWE <i>P</i>   | Hobs                   | Hexp   | HWE <i>P</i> | Hobs                   | Hexp   | HWE <i>P</i>  | Hobs                    | Hexp   | HWE <i>P</i> |
| <b>D8S1179</b> | 0.7727                     | 0.7738 | 0.0967         | 0.7441                 | 0.7447 | 0.2290       | 0.75862                | 0.7658 | 0.9885        | 0.7879                  | 0.7673 | 0.0688       |
| <b>D21S11</b>  | 0.8549                     | 0.8854 | 0.1890         | 0.8837                 | 0.8738 | 0.1684       | 0.81034                | 0.8574 | 0.6888        | 0.8529                  | 0.8717 | 0.6748       |
| <b>D7S820</b>  | 0.7779                     | 0.7870 | 0.1144         | 0.7441                 | 0.7647 | 0.7829       | 0.7069                 | 0.7643 | 0.7171        | 0.7832                  | 0.7768 | 0.3912       |
| <b>CSF1PO</b>  | 0.7804                     | 0.8076 | <b>0.0007*</b> | 0.7209                 | 0.7865 | 0.5515       | 0.7931                 | 0.8115 | 0.4016        | 0.7724                  | 0.7959 | 0.6330       |
| <b>D3S1358</b> | 0.7201                     | 0.7293 | 0.8766         | 0.6976                 | 0.7398 | 0.2769       | 0.7069                 | 0.7117 | 0.7010        | 0.7275                  | 0.7319 | 0.4994       |
| <b>TH01</b>    | 0.7111                     | 0.7188 | 0.2138         | 0.6976                 | 0.7275 | 0.2921       | 0.6724                 | 0.7163 | 0.1131        | 0.7182                  | 0.7119 | 0.1035       |
| <b>D13S317</b> | 0.7175                     | 0.7264 | 0.0973         | 0.5116                 | 0.5641 | 0.5553       | 0.5000                 | 0.6699 | <b>0.0014</b> | 0.7414                  | 0.7289 | 0.6245       |
| <b>D16S539</b> | 0.7522                     | 0.7718 | 0.3057         | 0.7209                 | 0.7326 | 0.2737       | 0.77586                | 0.7823 | 0.6910        | 0.7631                  | 0.7616 | 0.9347       |
| <b>D2S1338</b> | 0.8575                     | 0.8859 | 0.1093         | 0.8604                 | 0.8640 | 0.6568       | 0.91379                | 0.9039 | 0.7171        | 0.8498                  | 0.8769 | 0.2828       |
| <b>D19S433</b> | 0.8023                     | 0.8399 | <b>0.0006*</b> | 0.7907                 | 0.829  | 0.7670       | 0.91379                | 0.8523 | 0.0062        | 0.8235                  | 0.8311 | 0.2338       |
| <b>vWA</b>     | 0.8048                     | 0.8209 | 0.7287         | 0.8837                 | 0.8459 | 0.9779       | 0.77586                | 0.8231 | 0.4979        | 0.8003                  | 0.8178 | 0.2902       |
| <b>TPOX</b>    | 0.7509                     | 0.7591 | 0.1434         | 0.8139                 | 0.7734 | 0.3943       | 0.77586                | 0.7733 | 0.1884        | 0.7631                  | 0.7654 | 0.9037       |
| <b>D18S51</b>  | 0.8716                     | 0.8831 | 0.7349         | 0.8837                 | 0.8730 | 0.1972       | 0.7931                 | 0.8729 | 0.2608        | 0.8823                  | 0.8761 | 0.9091       |
| <b>D5S818</b>  | 0.7471                     | 0.7479 | 0.0076         | 0.7209                 | 0.7507 | 0.9813       | 0.58621                | 0.6735 | 0.0253        | 0.7445                  | 0.7399 | 0.0800       |
| <b>FGA</b>     | 0.8446                     | 0.8752 | 0.1581         | 0.8604                 | 0.8741 | 0.6342       | 0.8965                 | 0.8694 | 0.6888        | 0.8513                  | 0.8731 | 0.0695       |

E

F

G

|                | Khoisan Khoe-kwadi (n=133) |        |              | Khoisan Kx'a (n=58) |        |              | Khoisan Tuu (n=32) |        |                |
|----------------|----------------------------|--------|--------------|---------------------|--------|--------------|--------------------|--------|----------------|
| Locus          | Hobs                       | Hexp   | HWE <i>P</i> | Hobs                | Hexp   | HWE <i>P</i> | Hobs               | Hexp   | HWE <i>P</i>   |
| <b>D8S1179</b> | 0.7519                     | 0.7976 | 0.7088       | 0.7586              | 0.8093 | 0.6632       | 0.8438             | 0.7813 | 0.8805         |
| <b>D21S11</b>  | 0.9023                     | 0.9071 | 0.4263       | 0.9483              | 0.9041 | 0.2102       | 0.8438             | 0.8909 | 0.0652         |
| <b>D7S820</b>  | 0.7820                     | 0.8135 | 0.0427       | 0.8103              | 0.7939 | 0.1783       | 0.7188             | 0.7589 | 0.0570         |
| <b>CSF1PO</b>  | 0.8045                     | 0.8075 | 0.7385       | 0.7414              | 0.8000 | 0.1201       | 0.7813             | 0.8036 | 0.1402         |
| <b>D3S1358</b> | 0.7143                     | 0.7212 | 0.7289       | 0.7241              | 0.7199 | 0.2188       | 0.6563             | 0.5947 | 0.8124         |
| <b>TH01</b>    | 0.7368                     | 0.7313 | 0.6719       | 0.6897              | 0.7003 | 0.2799       | 0.6875             | 0.6319 | 0.5724         |
| <b>D13S317</b> | 0.6993                     | 0.7271 | 0.0562       | 0.7414              | 0.6891 | 0.4463       | 0.6250             | 0.7574 | 0.1643         |
| <b>D16S539</b> | 0.7293                     | 0.8059 | 0.3992       | 0.7414              | 0.7924 | 0.5114       | 0.6250             | 0.8155 | 0.0584         |
| <b>D2S1338</b> | 0.8496                     | 0.8861 | 0.3649       | 0.9655              | 0.9039 | 0.4063       | 0.9063             | 0.8958 | 0.0517         |
| <b>D19S433</b> | 0.8120                     | 0.8593 | 0.1875       | 0.6379              | 0.7892 | 0.0609       | 0.5000             | 0.8115 | <b>0.0013*</b> |
| <b>vWA</b>     | 0.8120                     | 0.8206 | 0.9994       | 0.6724              | 0.7712 | 0.0885       | 0.6875             | 0.7753 | 0.7238         |
| <b>TPOX</b>    | 0.6842                     | 0.7053 | 0.2157       | 0.8103              | 0.7490 | 0.0490       | 0.7500             | 0.6701 | <b>0.0018</b>  |
| <b>D18S51</b>  | 0.8421                     | 0.8946 | 0.5419       | 0.9138              | 0.8903 | 0.9802       | 0.9063             | 0.9023 | 0.9808         |
| <b>D5S818</b>  | 0.7444                     | 0.7755 | 0.0810       | 0.7241              | 0.7555 | 0.0406       | 0.7813             | 0.7173 | 0.6173         |
| <b>FGA</b>     | 0.8196                     | 0.8762 | 0.1149       | 0.8966              | 0.8906 | 0.0275       | 0.8750             | 0.8487 | 0.1045         |

|                | H                        |        |              | I                       |        |                | J                         |        |              | K                        |        |              | L                        |        |              |
|----------------|--------------------------|--------|--------------|-------------------------|--------|----------------|---------------------------|--------|--------------|--------------------------|--------|--------------|--------------------------|--------|--------------|
|                | Central District (n=264) |        |              | Ghanzi District (n=168) |        |                | Kgalagadi District (n=20) |        |              | Kgatleng District (n=21) |        |              | Kweneng District (n=106) |        |              |
| Locus          | Hobs                     | Hexp   | HWE <i>P</i> | Hobs                    | Hexp   | HWE <i>P</i>   | Hobs                      | Hexp   | HWE <i>P</i> | Hobs                     | Hexp   | HWE <i>P</i> | Hobs                     | Hexp   | HWE <i>P</i> |
| <b>D8S1179</b> | 0.7917                   | 0.7563 | 0.1558       | 0.7738                  | 0.7791 | 0.8184         | 0.8500                    | 0.7923 | 0.9916       | 0.8095                   | 0.8060 | 0.4429       | 0.8208                   | 0.7786 | 0.2719       |
| <b>D21S11</b>  | 0.8296                   | 0.8677 | 0.1074       | 0.8869                  | 0.8984 | 0.0375         | 0.8500                    | 0.8885 | 0.7854       | 0.8571                   | 0.8966 | 0.3985       | 0.8113                   | 0.8683 | 0.6147       |
| <b>D7S820</b>  | 0.7576                   | 0.7711 | 0.2422       | 0.7321                  | 0.8109 | 0.0318         | 0.9000                    | 0.8064 | 0.1632       | 0.9048                   | 0.7979 | 0.1585       | 0.8113                   | 0.7752 | 0.7307       |
| <b>CSF1PO</b>  | 0.7765                   | 0.7898 | 0.7569       | 0.8214                  | 0.8252 | 0.0023         | 0.6500                    | 0.8013 | 0.0076       | 0.8571                   | 0.8211 | 0.3982       | 0.8491                   | 0.8068 | 0.4976       |
| <b>D3S1358</b> | 0.7689                   | 0.7403 | 0.6279       | 0.6667                  | 0.6784 | 0.5516         | 0.7500                    | 0.7397 | 0.6453       | 0.7619                   | 0.7549 | 0.6121       | 0.7359                   | 0.7089 | 0.5400       |
| <b>TH01</b>    | 0.7349                   | 0.7014 | 0.1629       | 0.7024                  | 0.7183 | 0.5698         | 0.6000                    | 0.6180 | 0.8197       | 0.7143                   | 0.6771 | 0.9085       | 0.6415                   | 0.7206 | 0.2787       |
| <b>D13S317</b> | 0.7424                   | 0.7415 | 0.4299       | 0.6786                  | 0.6992 | 0.3339         | 0.7000                    | 0.7769 | 0.2006       | 0.6191                   | 0.6481 | 0.3524       | 0.7925                   | 0.7314 | 0.4064       |
| <b>D16S539</b> | 0.7538                   | 0.7641 | 0.4543       | 0.7202                  | 0.8055 | 0.0129         | 0.7500                    | 0.7756 | 0.7256       | 0.7143                   | 0.7456 | 0.2767       | 0.7642                   | 0.7359 | 0.3399       |
| <b>D2S1338</b> | 0.8182                   | 0.8784 | 0.3588       | 0.8810                  | 0.8917 | 0.2036         | 1.0000                    | 0.8808 | 0.8813       | 0.8571                   | 0.8862 | 0.3985       | 0.8868                   | 0.8813 | 0.0073       |
| <b>D19S433</b> | 0.8220                   | 0.8314 | 0.6908       | 0.7262                  | 0.8402 | <b>0.0007*</b> | 0.7500                    | 0.8397 | 0.3050       | 0.8571                   | 0.9001 | 0.1621       | 0.7642                   | 0.8154 | 0.5287       |
| <b>vWA</b>     | 0.8447                   | 0.8279 | 0.8909       | 0.8095                  | 0.8010 | 0.9790         | 0.8500                    | 0.8295 | 0.1221       | 0.8571                   | 0.8420 | 0.5947       | 0.7642                   | 0.8170 | 0.0466       |
| <b>TPOX</b>    | 0.7424                   | 0.7720 | 0.7687       | 0.7202                  | 0.6952 | 0.0410         | 0.8000                    | 0.7295 | 0.3789       | 0.6191                   | 0.7096 | 0.1475       | 0.7736                   | 0.7473 | 0.1849       |
| <b>D18S51</b>  | 0.8864                   | 0.8748 | 0.5201       | 0.8571                  | 0.9000 | 0.4641         | 0.8500                    | 0.9051 | 0.2641       | 0.9524                   | 0.8432 | 0.7488       | 0.8868                   | 0.8774 | 0.6548       |
| <b>D5S818</b>  | 0.7500                   | 0.7294 | 0.7622       | 0.7500                  | 0.7824 | 0.0486         | 0.6000                    | 0.7013 | 0.0730       | 0.7619                   | 0.7689 | 0.9127       | 0.7453                   | 0.7290 | 0.5017       |
| <b>FGA</b>     | 0.8485                   | 0.8741 | 0.0710       | 0.8155                  | 0.8690 | 0.0018         | 0.8500                    | 0.8782 | 0.4449       | 0.9048                   | 0.9013 | 0.7433       | 0.8679                   | 0.8789 | 0.1010       |

|                | M                         |        |              | N                          |        |              | O                         |        |              | P                        |        |              |
|----------------|---------------------------|--------|--------------|----------------------------|--------|--------------|---------------------------|--------|--------------|--------------------------|--------|--------------|
|                | Northeast District (n=45) |        |              | Northwest District (n=260) |        |              | Southeast District (n=32) |        |              | Southern District (n=74) |        |              |
| Locus          | Hobs                      | Hexp   | HWE <i>P</i> | Hobs                       | Hexp   | HWE <i>P</i> | Hobs                      | Hexp   | HWE <i>P</i> | Hobs                     | Hexp   | HWE <i>P</i> |
| <b>D8S1179</b> | 0.7111                    | 0.7738 | 0.5358       | 0.7462                     | 0.7845 | 0.2919       | 0.8784                    | 0.7550 | 0.2963       | 0.7973                   | 0.7793 | 0.2805       |
| <b>D21S11</b>  | 0.8444                    | 0.8652 | 0.6275       | 0.9039                     | 0.8958 | 0.2975       | 0.9063                    | 0.8720 | 0.6853       | 0.8784                   | 0.8590 | 0.6166       |
| <b>D7S820</b>  | 0.8444                    | 0.7758 | 0.0172       | 0.7846                     | 0.7758 | 0.5823       | 0.7500                    | 0.7674 | 0.9807       | 0.7838                   | 0.7917 | 0.6176       |
| <b>CSF1PO</b>  | 0.7556                    | 0.7800 | 0.9794       | 0.7269                     | 0.7942 | 0.1754       | 0.7500                    | 0.8199 | 0.5721       | 0.7297                   | 0.8121 | 0.1355       |
| <b>D3S1358</b> | 0.6222                    | 0.7239 | 0.5922       | 0.7231                     | 0.7358 | 0.5184       | 0.6875                    | 0.7282 | 0.0856       | 0.6757                   | 0.7411 | 0.1860       |
| <b>TH01</b>    | 0.7333                    | 0.7086 | 0.9956       | 0.7077                     | 0.7258 | 0.0801       | 0.6563                    | 0.7406 | 0.5800       | 0.8514                   | 0.7289 | 0.0773       |
| <b>D13S317</b> | 0.6444                    | 0.7316 | 0.0586       | 0.6615                     | 0.6989 | 0.0142       | 0.6875                    | 0.7064 | 0.4648       | 0.7568                   | 0.7199 | 0.7431       |
| <b>D16S539</b> | 0.7111                    | 0.7328 | 0.9665       | 0.7731                     | 0.7731 | 0.1642       | 0.8125                    | 0.7818 | 0.4018       | 0.7162                   | 0.7911 | 0.2414       |
| <b>D2S1338</b> | 0.8444                    | 0.8674 | 0.1625       | 0.8846                     | 0.8904 | 0.8162       | 0.8438                    | 0.8557 | 0.7053       | 0.8514                   | 0.8689 | 0.4514       |
| <b>D19S433</b> | 0.8444                    | 0.8315 | 0.5433       | 0.8346                     | 0.8444 | 0.5295       | 0.8750                    | 0.8581 | 0.5565       | 0.8108                   | 0.8038 | 0.2050       |
| <b>vWA</b>     | 0.8667                    | 0.8162 | 0.9352       | 0.7269                     | 0.8173 | 0.0619       | 0.8438                    | 0.7986 | 0.9537       | 0.7162                   | 0.8014 | 0.1353       |
| <b>TPOX</b>    | 0.7333                    | 0.7718 | 0.7762       | 0.7885                     | 0.7768 | 0.0456       | 0.6563                    | 0.7634 | 0.6332       | 0.7973                   | 0.7570 | 0.7061       |
| <b>D18S51</b>  | 0.8000                    | 0.8582 | 0.2877       | 0.8654                     | 0.8841 | 0.7004       | 0.8438                    | 0.8765 | 0.0024       | 0.9324                   | 0.8865 | 0.4182       |
| <b>D5S818</b>  | 0.7556                    | 0.7636 | 0.3835       | 0.7077                     | 0.7258 | 0.3855       | 0.7813                    | 0.7361 | 0.4285       | 0.6622                   | 0.7605 | 0.1607       |
| <b>FGA</b>     | 0.7556                    | 0.8527 | 0.1670       | 0.8692                     | 0.8751 | 0.4001       | 0.7813                    | 0.8447 | 0.6009       | 0.9324                   | 0.8800 | 0.4232       |

**Supplementary Table S4** Maximum Likelihood (ML) Silent allele frequencies for the Botswana populations: overall (A). according to the Bantu (B-D) and Khoisan (E-G) ethno-linguistic groups. and according to districts (H-P).

|                | A                             | B                         | C                         | D                          | E                             | F                      | G                     |
|----------------|-------------------------------|---------------------------|---------------------------|----------------------------|-------------------------------|------------------------|-----------------------|
|                | Overall population<br>(n=990) | Bantu Central K<br>(n=43) | Bantu Central R<br>(n=58) | Bantu Central S<br>(n=646) | Khoisan Khoe-kwadi<br>(n=133) | Khoisan Kx'a<br>(n=58) | Khoisan Tuu<br>(n=32) |
| <b>Locus</b>   |                               |                           |                           |                            |                               |                        |                       |
| <b>D8S1179</b> | 0.006                         | 0                         | 0                         | 0.002                      | 0.027                         | 0.017                  | 0                     |
| <b>D21S11</b>  | 0.012                         | 0                         | 0.031                     | 0.012                      | 0                             | 0                      | 0.025                 |
| <b>D7S820</b>  | 0.006                         | 0                         | 0.023                     | 0                          | 0.009                         | 0                      | 0.044                 |
| <b>CSF1PO</b>  | 0.014                         | 0.022                     | 0                         | 0.005                      | 0                             | 0.024                  | 0.031                 |
| <b>D3S1358</b> | 0.002                         | 0.023                     | 0                         | 0                          | 0                             | 0.015                  | 0                     |
| <b>TH01</b>    | 0                             | 0.02                      | 0.013                     | 0                          | 0                             | 0                      | 0                     |
| <b>D13S317</b> | 0.01                          | 0.008                     | 0.083                     | 0                          | 0.022                         | 0                      | 0.083                 |
| <b>D16S539</b> | 0.009                         | 0                         | 0                         | 0                          | 0.032                         | 0.012                  | 0.09                  |
| <b>D2S1338</b> | 0.013                         | 0                         | 0                         | 0.017                      | 0.017                         | 0                      | 0                     |
| <b>D19S433</b> | 0.024                         | 0.027                     | 0                         | 0.006                      | 0.034                         | 0.078                  | 0.17                  |
| <b>vWA</b>     | 0.01                          | 0                         | 0.019                     | 0.001                      | 0                             | 0.052                  | 0.038                 |
| <b>TPOX</b>    | 0.005                         | 0                         | 0                         | 0                          | 0.015                         | 0                      | 0.009                 |
| <b>D18S51</b>  | 0.009                         | 0.013                     | 0.045                     | 0                          | 0.018                         | 0                      | 0                     |
| <b>D5S818</b>  | 0.013                         | 0                         | 0.031                     | 0.004                      | 0.018                         | 0.023                  | 0                     |
| <b>FGA</b>     | 0.008                         | 0                         | 0                         | 0.01                       | 0.019                         | 0                      | 0.004                 |

H            I            J            K            L            M            N            O            P

| Locus   | Central District<br>(n=264) | Ghanzi District<br>(n=168) | Kgalagadi District<br>(n=20) | Kgatleng District<br>(n=21) | Kweneng District<br>(n=106) | Northeast District<br>(n=45) | Northwest District<br>(n=260) | Southeast District<br>(n=32) | Southern District<br>(74) |
|---------|-----------------------------|----------------------------|------------------------------|-----------------------------|-----------------------------|------------------------------|-------------------------------|------------------------------|---------------------------|
| D8S1179 | 0                           | 0.001                      | 0                            | 0                           | 0                           | 0.041                        | 0.021                         | 0.02                         | 0                         |
| D21S11  | 0.023                       | 0.004                      | 0                            | 0                           | 0.037                       | 0                            | 0.001                         | 0                            | 0                         |
| D7S820  | 0.004                       | 0.036                      | 0                            | 0                           | 0                           | 0.012                        | 0                             | 0                            | 0                         |
| CSF1PO  | 0.007                       | 0.011                      | 0.051                        | 0                           | 0                           | 0                            | 0.019                         | 0.01                         | 0.009                     |
| D3S1358 | 0                           | 0                          | 0                            | 0                           | 0                           | 0.042                        | 0.009                         | 0.026                        | 0.032                     |
| TH01    | 0                           | 0.013                      | 0                            | 0                           | 0.02                        | 0                            | 0                             | 0.014                        | 0                         |
| D13S317 | 0                           | 0.016                      | 0.018                        | 0                           | 0                           | 0.039                        | 0.024                         | 0                            | 0                         |
| D16S539 | 0                           | 0.041                      | 0.017                        | 0.02                        | 0                           | 0.009                        | 0                             | 0                            | 0.044                     |
| D2S1338 | 0.037                       | 0.003                      | 0                            | 0.021                       | 0.007                       | 0.004                        | 0                             | 0                            | 0                         |
| D19S433 | 0.012                       | 0.07                       | 0.032                        | 0                           | 0.017                       | 0                            | 0.005                         | 0                            | 0                         |
| vWA     | 0                           | 0                          | 0                            | 0.006                       | 0.024                       | 0                            | 0.04                          | 0                            | 0.045                     |
| TPOX    | 0.012                       | 0                          | 0                            | 0.063                       | 0                           | 0.014                        | 0                             | 0.038                        | 0                         |
| D18S51  | 0                           | 0.013                      | 0.036                        | 0                           | 0.003                       | 0.022                        | 0.015                         | 0.004                        | 0                         |
| D5S818  | 0                           | 0.024                      | 0.023                        | 0                           | 0                           | 0                            | 0.014                         | 0                            | 0.048                     |
| FGA     | 0.01                        | 0.018                      | 0.02                         | 0                           | 0.003                       | 0.037                        | 0                             | 0                            | 0                         |

**Supplementary Table S5** Pairwise genetic distance ( $F_{ST}$ ) (below diagonal) and P-values (above diagonal) of the different Bantu and Khoisan ethno-linguistic groups in Botswana. Significant values ( $P < 0.003$ ) are indicated by an asterisk \*.

|                  | <b>Central K</b> | <b>Central R</b> | <b>Central S</b> | <b>Khoe</b> | <b>Kx'a</b> | <b>Tuu</b> |
|------------------|------------------|------------------|------------------|-------------|-------------|------------|
| <b>Central K</b> | -                | 0.21226          | 0.00158          | 0.00000     | 0.00000     | 0.00000    |
| <b>Central R</b> | 0.00174          | -                | 0.00020          | 0.00000     | 0.00000     | 0.00000    |
| <b>Central S</b> | 0.00402*         | 0.00377*         | -                | 0.00000     | 0.00000     | 0.00000    |
| <b>Khoe</b>      | 0.01363*         | 0.00921*         | 0.01024*         | -           | 0.00000     | 0.00000    |
| <b>Kx'a</b>      | 0.02312*         | 0.01905*         | 0.02026*         | 0.00656*    | -           | 0.00000    |
| <b>Tuu</b>       | 0.03069*         | 0.02819*         | 0.03009*         | 0.01622*    | 0.02183*    | -          |

**Supplementary Table S6** Pairwise genetic distance ( $F_{ST}$ ) (below diagonal) and P-values (above diagonal) of the nine administrative districts in Botswana. Significant values ( $P < 0.0003$ ) are indicated by an asterisk \*.

|           | Central  | Ghanzi   | Kgalagadi | Kgatleng | Kweneng  | Northeast | Northwest | Southeast | Southern |
|-----------|----------|----------|-----------|----------|----------|-----------|-----------|-----------|----------|
| Central   | -        | 0.00000  | 0.19444   | 0.78071  | 0.11118  | 0.88457   | 0.00000   | 0.18384   | 0.09395  |
| Ghanzi    | 0.01456* | -        | 0.02792   | 0.00050  | 0.00000  | 0.00000   | 0.00000   | 0.00000   | 0.00000  |
| Kgalagadi | 0.00208  | 0.00571  | -         | 0.75775  | 0.12771  | 0.23681   | 0.35393   | 0.44897   | 0.30344  |
| Kgatleng  | -0.00171 | 0.01017  | -0.00298  | -        | 0.65855  | 0.78052   | 0.50045   | 0.43996   | 0.57519  |
| Kweneng   | 0.00071  | 0.01792* | 0.00288   | -0.00128 | -        | 0.23235   | 0.00000   | 0.10593   | 0.06881  |
| Northeast | -0.00125 | 0.01623* | 0.00276   | -0.00217 | 0.00101  | -         | 0.50718   | 0.68290   | 0.07663  |
| Northwest | 0.00269* | 0.01238* | 0.00107   | 0.00011  | 0.00589* | 0.00005   | -         | 0.02505   | 0.00000  |
| Southeast | 0.00141  | 0.01190* | 0.00058   | 0.00044  | 0.00231  | -0.00091  | 0.00349   | -         | 0.50431  |
| Southern  | 0.00104  | 0.01226* | 0.00144   | -0.00061 | 0.00161  | 0.00254   | 0.00526*  | -0.00004  | -        |



**Supplementary Table S7** Forensic statistics metric for each locus for the Botswana populations: the overall population (A), according to the Bantu (B-D) and Khoisan (E-G) ethno-linguistic groups, and according to districts (H-P). Discrimination capacity (DC), match probability (MP), combined random match probability, polymorphic information capacity (PIC), typical paternity index (TPI), combined paternity index, power of exclusion (PE), and combined power of exclusion (CPE).

A

|                 | <b>Overall population (n=990)</b> |                        |       |       |     |
|-----------------|-----------------------------------|------------------------|-------|-------|-----|
| <b>Locus</b>    | PE                                | MP                     | PD    | PIC   | TPI |
| <b>D8S1179</b>  | 0.558                             | 0.086                  | 0.914 | 0.742 | 2.2 |
| <b>D21S11</b>   | 0.585                             | 0.053                  | 0.947 | 0.805 | 2.4 |
| <b>D7S820</b>   | 0.558                             | 0.079                  | 0.921 | 0.752 | 2.2 |
| <b>CSF1PO</b>   | 0.549                             | 0.061                  | 0.939 | 0.782 | 2.2 |
| <b>D3S1358</b>  | 0.459                             | 0.119                  | 0.881 | 0.684 | 1.7 |
| <b>TH01</b>     | 0.452                             | 0.124                  | 0.876 | 0.673 | 1.7 |
| <b>D13S317</b>  | 0.439                             | 0.119                  | 0.881 | 0.678 | 1.7 |
| <b>D16S539</b>  | 0.511                             | 0.079                  | 0.921 | 0.747 | 2.0 |
| <b>D2S1338</b>  | 0.72                              | 0.024                  | 0.976 | 0.876 | 3.6 |
| <b>D19S433</b>  | 0.492                             | 0.112                  | 0.888 | 0.70  | 1.9 |
| <b>vWA</b>      | 0.582                             | 0.056                  | 0.944 | 0.794 | 2.3 |
| <b>TPOX</b>     | 0.516                             | 0.097                  | 0.903 | 0.723 | 2.0 |
| <b>D18S51</b>   | 0.744                             | 0.025                  | 0.975 | 0.873 | 3.9 |
| <b>D5S818</b>   | 0.477                             | 0.107                  | 0.893 | 0.705 | 1.8 |
| <b>FGA</b>      | 0.698                             | 0.029                  | 0.971 | 0.862 | 3.3 |
| <b>Combined</b> | 0.999996541                       | $6.28 \times 10^{-19}$ |       |       |     |

|                 | <b>B</b>                      |                         |           |            |            | <b>C</b>                      |                        |           |            |            | <b>D</b>                       |                         |           |            |            |
|-----------------|-------------------------------|-------------------------|-----------|------------|------------|-------------------------------|------------------------|-----------|------------|------------|--------------------------------|-------------------------|-----------|------------|------------|
|                 | <b>Bantu Central K (n=43)</b> |                         |           |            |            | <b>Bantu Central R (n=58)</b> |                        |           |            |            | <b>Bantu Central S (n=646)</b> |                         |           |            |            |
| <b>Locus</b>    | <b>PE</b>                     | <b>MP</b>               | <b>PD</b> | <b>PIC</b> | <b>TPI</b> | <b>PE</b>                     | <b>MP</b>              | <b>PD</b> | <b>PIC</b> | <b>TPI</b> | <b>PE</b>                      | <b>MP</b>               | <b>PD</b> | <b>PIC</b> | <b>TPI</b> |
| <b>D8S1179</b>  | 0.499                         | 0.131                   | 0.868     | 0.700      | 1.9        | 0.524                         | 0.091                  | 0.909     | 0.724      | 2.0        | 0.585                          | 0.0934                  | 0.906     | 0.732      | 2.4        |
| <b>D21S11</b>   | 0.662                         | 0.104                   | 0.895     | 0.849      | 3.0        | 0.520                         | 0.074                  | 0.925     | 0.834      | 2.0        | 0.607                          | 0.0568                  | 0.943     | 0.7925     | 2.5        |
| <b>D7S820</b>   | 0.163                         | 0.287                   | 0.712     | 0.718      | 0.9        | 0.240                         | 0.226                  | 0.773     | 0.718      | 1.1        | 0.387                          | 0.2179                  | 0.782     | 0.742      | 1.5        |
| <b>CSF1PO</b>   | 0.336                         | 0.142                   | 0.857     | 0.745      | 1.3        | 0.391                         | 0.136                  | 0.863     | 0.779      | 1.5        | 0.382                          | 0.1405                  | 0.859     | 0.767      | 1.5        |
| <b>D3S1358</b>  | 0.424                         | 0.127                   | 0.872     | 0.685      | 1.6        | 0.439                         | 0.143                  | 0.856     | 0.651      | 1.7        | 0.477                          | 0.1215                  | 0.878     | 0.685      | 1.8        |
| <b>TH01</b>     | 0.424                         | 0.137                   | 0.862     | 0.671      | 1.6        | 0.421                         | 0.143                  | 0.856     | 0.656      | 2.2        | 0.457                          | 0.1335                  | 0.866     | 0.661      | 1.7        |
| <b>D13S317</b>  | 0.197                         | 0.254                   | 0.745     | 0.493      | 1.0        | 0.179                         | 0.177                  | 0.822     | 0.608      | 0.9        | 0.468                          | 0.1295                  | 0.870     | 0.685      | 1.8        |
| <b>D16S539</b>  | 0.336                         | 0.214                   | 0.785     | 0.683      | 1.3        | 0.450                         | 0.172                  | 0.827     | 0.740      | 1.7        | 0.404                          | 0.1525                  | 0.847     | 0.729      | 1.5        |
| <b>D2S1338</b>  | 0.715                         | 0.051                   | 0.948     | 0.839      | 3.5        | 0.823                         | 0.033                  | 0.966     | 0.887      | 5.8        | 0.696                          | 0.0283                  | 0.971     | 0.864      | 3.3        |
| <b>D19S433</b>  | 0.496                         | 0.094                   | 0.905     | 0.799      | 1.9        | 0.651                         | 0.210                  | 0.789     | 0.830      | 2.9        | 0.485                          | 0.1116                  | 0.888     | 0.697      | 1.8        |
| <b>vWA</b>      | 0.7623                        | 0.056                   | 0.943     | 0.815      | 4.3        | 0.555                         | 0.066                  | 0.933     | 0.791      | 2.2        | 0.607                          | 0.0584                  | 0.941     | 0.793      | 2.5        |
| <b>TPOX</b>     | 0.599                         | 0.680                   | 0.320     | 0.730      | 2.5        | 0.240                         | 0.308                  | 0.691     | 0.728      | 1.1        | 0.126                          | 0.3990                  | 0.601     | 0.726      | 0.8        |
| <b>D18S51</b>   | 0.795                         | 0.071                   | 0.928     | 0.849      | 5.0        | 0.585                         | 0.045                  | 0.954     | 0.852      | 2.4        | 0.747                          | 0.0312                  | 0.968     | 0.863      | 4.0        |
| <b>D5S818</b>   | 0.363                         | 0.162                   | 0.837     | 0.704      | 1.4        | 0.196                         | 0.225                  | 0.774     | 0.610      | 1.0        | 0.399                          | 0.1568                  | 0.843     | 0.697      | 1.5        |
| <b>FGA</b>      | 0.702                         | 0.050                   | 0.949     | 0.849      | 3.4        | 0.772                         | 0.053                  | 0.946     | 0.848      | 4.5        | 0.680                          | 0.0346                  | 0.965     | 0.860      | 3.1        |
| <b>Combined</b> | 0.999991                      | 5.91 x10 <sup>-14</sup> |           |            |            | 0.999976                      | 1.05x10 <sup>-14</sup> |           |            |            | 0.999986                       | 6.28 x10 <sup>-16</sup> |           |            |            |

E

F

G

| Locus    | Khoisan Khoe-kwadi (n=133) |                        |       |       |     | Khoisan Kx'a (n=58) |                        |       |       |      | Khoisan Tuu (n=32) |                        |       |       |     |
|----------|----------------------------|------------------------|-------|-------|-----|---------------------|------------------------|-------|-------|------|--------------------|------------------------|-------|-------|-----|
|          | PE                         | MP                     | PD    | PIC   | TPI | PE                  | MP                     | PD    | PIC   | TPI  | PE                 | MP                     | PD    | PIC   | TPI |
| D8S1179  | 0.5130                     | 0.074                  | 0.925 | 0.764 | 2.0 | 0.524               | 0.071                  | 0.928 | 0.774 | 2.0  | 0.682              | 0.103                  | 0.896 | 0.733 | 3.2 |
| D21S11   | 0.6531                     | 0.041                  | 0.925 | 0.896 | 2.9 | 0.898               | 0.08                   | 0.920 | 0.887 | 10   | 0.487              | 0.113                  | 0.886 | 0.866 | 1.9 |
| D7S820   | 0.4557                     | 0.200                  | 0.799 | 0.783 | 1.7 | 0.543               | 0.242                  | 0.757 | 0.756 | 2.1  | 0.378              | 0.283                  | 0.716 | 0.708 | 1.5 |
| CSF1PO   | 0.3294                     | 0.182                  | 0.817 | 0.782 | 1.3 | 0.209               | 0.160                  | 0.839 | 0.763 | 1.05 | 0.330              | 0.157                  | 0.842 | 0.764 | 1.3 |
| D3S1358  | 0.2409                     | 0.308                  | 0.691 | 0.675 | 1.1 | 0.466               | 0.152                  | 0.847 | 0.667 | 1.8  | 0.363              | 0.212                  | 0.787 | 0.552 | 1.4 |
| TH01     | 0.4875                     | 0.118                  | 0.881 | 0.687 | 1.9 | 0.412               | 0.145                  | 0.854 | 0.655 | 1.6  | 0.409              | 0.197                  | 0.802 | 0.581 | 1.6 |
| D13S317  | 0.4174                     | 0.133                  | 0.866 | 0.686 | 1.6 | 0.418               | 0.197                  | 0.802 | 0.651 | 1.6  | 0.226              | 0.173                  | 0.826 | 0.703 | 1.0 |
| D16S539  | 0.3662                     | 0.124                  | 0.875 | 0.775 | 1.4 | 0.409               | 0.156                  | 0.843 | 0.754 | 1.6  | 0.165              | 0.163                  | 0.836 | 0.775 | 0.9 |
| D2S1338  | 0.6941                     | 0.030                  | 0.969 | 0.871 | 3.3 | 0.930               | 0.037                  | 0.962 | 0.887 | 14.5 | 0.808              | 0.064                  | 0.935 | 0.870 | 5.3 |
| D19S433  | 0.5214                     | 0.103                  | 0.896 | 0.843 | 2.0 | 0.232               | 0.142                  | 0.857 | 0.763 | 1.1  | 0.202              | 0.094                  | 0.905 | 0.769 | 1.0 |
| vWA      | 0.6216                     | 0.057                  | 0.942 | 0.793 | 2.6 | 0.386               | 0.101                  | 0.898 | 0.728 | 1.5  | 0.409              | 0.099                  | 0.900 | 0.725 | 1.6 |
| TPOX     | 0.4507                     | 0.591                  | 0.408 | 0.653 | 1.7 | 0.187               | 0.500                  | 0.500 | 0.707 | 1    | 0                  | 0.555                  | 0.444 | 0.611 | 0.5 |
| D18S51   | 0.6490                     | 0.027                  | 0.972 | 0.882 | 2.8 | 0.817               | 0.036                  | 0.963 | 0.871 | 5.6  | 0.795              | 0.04                   | 0.960 | 0.880 | 5   |
| D5S818   | 0.4202                     | 0.156                  | 0.843 | 0.742 | 1.6 | 0.407               | 0.158                  | 0.841 | 0.708 | 1.5  | 0.477              | 0.210                  | 0.789 | 0.658 | 1.8 |
| FGA      | 0.6051                     | 0.038                  | 0.961 | 0.861 | 2.5 | 0.754               | 0.062                  | 0.937 | 0.872 | 4.2  | 0.736              | 0.0884                 | 0.911 | 0.815 | 3.8 |
| Combined | 0.999978                   | $1.21 \times 10^{-15}$ |       |       |     | 0.999999            | $1.52 \times 10^{-14}$ |       |       |      | 0.999958           | $6.28 \times 10^{-19}$ |       |       |     |

H

I

J

|                 | Central District (n=264) |                        |       |       |     | Ghanzi District (n=168) |                        |       |       |     | Kgalagadi District (n=20) |                        |       |       |     |
|-----------------|--------------------------|------------------------|-------|-------|-----|-------------------------|------------------------|-------|-------|-----|---------------------------|------------------------|-------|-------|-----|
| Locus           | PE                       | MP                     | PD    | PIC   | TPI | PE                      | MP                     | PD    | PIC   | TPI | PE                        | MP                     | PD    | PIC   | TPI |
| <b>D8S1179</b>  | 0.584                    | 0.103                  | 0.897 | 0.719 | 2.4 | 0.551                   | 0.086                  | 0.914 | 0.742 | 2.2 | 0.695                     | 0.105                  | 0.895 | 0.737 | 3.3 |
| <b>D21S11</b>   | 0.609                    | 0.066                  | 0.934 | 0.784 | 2.5 | 0.769                   | 0.028                  | 0.972 | 0.887 | 4.4 | 0.695                     | 0.060                  | 0.940 | 0.853 | 3.3 |
| <b>D7S820</b>   | 0.523                    | 0.088                  | 0.912 | 0.735 | 2.1 | 0.480                   | 0.066                  | 0.934 | 0.781 | 1.9 | 0.795                     | 0.140                  | 0.860 | 0.752 | 5.0 |
| <b>CSF1PO</b>   | 0.556                    | 0.076                  | 0.924 | 0.758 | 2.2 | 0.639                   | 0.062                  | 0.938 | 0.800 | 2.8 | 0.355                     | 0.135                  | 0.865 | 0.751 | 1.4 |
| <b>D3S1358</b>  | 0.543                    | 0.120                  | 0.880 | 0.695 | 2.2 | 0.379                   | 0.156                  | 0.844 | 0.632 | 1.5 | 0.510                     | 0.140                  | 0.860 | 0.673 | 2.0 |
| <b>TH01</b>     | 0.484                    | 0.151                  | 0.849 | 0.646 | 1.9 | 0.432                   | 0.120                  | 0.880 | 0.677 | 1.7 | 0.291                     | 0.179                  | 0.821 | 0.557 | 1.3 |
| <b>D13S317</b>  | 0.497                    | 0.108                  | 0.892 | 0.699 | 1.9 | 0.396                   | 0.138                  | 0.862 | 0.656 | 1.6 | 0.428                     | 0.130                  | 0.870 | 0.720 | 1.7 |
| <b>D16S539</b>  | 0.906                    | 0.090                  | 0.910 | 0.730 | 1.3 | 0.460                   | 0.069                  | 0.931 | 0.774 | 1.8 | 0.510                     | 0.110                  | 0.890 | 0.725 | 2.0 |
| <b>D2S1338</b>  | 0.633                    | 0.028                  | 0.972 | 0.865 | 2.8 | 0.757                   | 0.028                  | 0.972 | 0.879 | 4.2 | 1.000                     | 0.075                  | 0.925 | 0.845 | 0   |
| <b>D19S433</b>  | 0.640                    | 0.050                  | 0.950 | 0.811 | 2.8 | 0.470                   | 0.049                  | 0.951 | 0.820 | 1.8 | 0.510                     | 0.085                  | 0.915 | 0.798 | 2.0 |
| <b>vWA</b>      | 0.684                    | 0.056                  | 0.944 | 0.803 | 3.2 | 0.617                   | 0.071                  | 0.929 | 0.770 | 2.6 | 0.695                     | 0.125                  | 0.875 | 0.782 | 3.3 |
| <b>TPOX</b>     | 0.497                    | 0.089                  | 0.911 | 0.733 | 1.9 | 0.460                   | 0.166                  | 0.834 | 0.643 | 1.8 | 0.599                     | 0.170                  | 0.830 | 0.671 | 2.5 |
| <b>D18S51</b>   | 0.768                    | 0.033                  | 0.967 | 0.860 | 4.4 | 0.709                   | 0.022                  | 0.978 | 0.889 | 3.5 | 0.695                     | 0.065                  | 0.935 | 0.872 | 3.3 |
| <b>D5S818</b>   | 0.510                    | 0.124                  | 0.876 | 0.684 | 2.  | 0.510                   | 0.088                  | 0.912 | 0.748 | 2.  | 0.291                     | 0.185                  | 0.815 | 0.625 | 1.3 |
| <b>FGA</b>      | 0.692                    | 0.032                  | 0.968 | 0.860 | 3.3 | 0.628                   | 0.039                  | 0.961 | 0.853 | 2.7 | 0.695                     | 0.075                  | 0.925 | 0.840 | 3.3 |
| <b>Combined</b> | 0.999999563              | 7.27x10 <sup>-18</sup> |       |       |     | 0.99999684              | 2.14x10 <sup>-18</sup> |       |       |     | 1.000000                  | 5.21x10 <sup>-15</sup> |       |       |     |

K

L

M

|                 | Kgatleng District (n=21) |                        |       |       |      | Kweneng District (n=106) |                        |       |       |     | Northeast District (n=45) |                        |       |       |     |
|-----------------|--------------------------|------------------------|-------|-------|------|--------------------------|------------------------|-------|-------|-----|---------------------------|------------------------|-------|-------|-----|
| Locus           | PE                       | MP                     | PD    | PIC   | TPI  | PE                       | MP                     | PD    | PIC   | TPI | PE                        | MP                     | PD    | PIC   | TPI |
| <b>D8S1179</b>  | 0.617                    | 0.116                  | 0.884 | 0.754 | 2.6  | 0.638                    | 0.098                  | 0.902 | 0.740 | 2.8 | 0.446                     | 0.094                  | 0.906 | 0.730 | 1.7 |
| <b>D21S11</b>   | 0.709                    | 0.061                  | 0.939 | 0.864 | 3.5  | 0.620                    | 0.035                  | 0.965 | 0.851 | 2.7 | 0.684                     | 0.049                  | 0.951 | 0.842 | 3.2 |
| <b>D7S820</b>   | 0.805                    | 0.152                  | 0.848 | 0.746 | 5.3  | 0.620                    | 0.094                  | 0.906 | 0.737 | 2.7 | 0.684                     | 0.136                  | 0.864 | 0.730 | 3.2 |
| <b>CSF1PO</b>   | 0.777                    | 0.135                  | 0.865 | 0.775 | 3.3  | 0.693                    | 0.081                  | 0.919 | 0.776 | 3.3 | 0.519                     | 0.083                  | 0.917 | 0.738 | 2.0 |
| <b>D3S1358</b>  | 0.530                    | 0.143                  | 0.857 | 0.691 | 2.1  | 0.486                    | 0.147                  | 0.853 | 0.654 | 1.9 | 0.318                     | 0.123                  | 0.877 | 0.665 | 1.3 |
| <b>TH01</b>     | 0.451                    | 0.179                  | 0.821 | 0.601 | 1.8  | 0.344                    | 0.121                  | 0.879 | 0.669 | 1.4 | 0.482                     | 0.144                  | 0.856 | 0.647 | 1.9 |
| <b>D13S317</b>  | 0.314                    | 0.202                  | 0.798 | 0.580 | 1.3  | 0.585                    | 0.126                  | 0.874 | 0.684 | 2.4 | 0.348                     | 0.128                  | 0.872 | 0.681 | 1.4 |
| <b>D16S539</b>  | 0.451                    | 0.138                  | 0.862 | 0.697 | 1.8  | 0.534                    | 0.107                  | 0.893 | 0.701 | 2.1 | 0.446                     | 0.119                  | 0.881 | 0.688 | 1.7 |
| <b>D2S1338</b>  | 0.709                    | 0.075                  | 0.925 | 0.851 | 3.5  | 0.769                    | 0.040                  | 0.960 | 0.865 | 4.4 | 0.684                     | 0.056                  | 0.944 | 0.842 | 3.2 |
| <b>D19S433</b>  | 0.709                    | 0.070                  | 0.930 | 0.868 | 3.5  | 0.534                    | 0.059                  | 0.941 | 0.790 | 2.1 | 0.684                     | 0.064                  | 0.936 | 0.802 | 3.2 |
| <b>vWA</b>      | 0.709                    | 0.088                  | 0.912 | 0.798 | 3.5  | 0.534                    | 0.073                  | 0.927 | 0.789 | 2.1 | 0.728                     | 0.075                  | 0.925 | 0.780 | 3.8 |
| <b>TPOX</b>     | 0.314                    | 0.170                  | 0.830 | 0.645 | 1.3  | 0.551                    | 0.124                  | 0.876 | 0.700 | 2.2 | 0.096                     | 0.095                  | 0.905 | 0.725 | 4.4 |
| <b>D18S51</b>   | 0.903                    | 0.093                  | 0.907 | 0.800 | 10.5 | 0.769                    | 0.037                  | 0.963 | 0.860 | 4.4 | 0.599                     | 0.053                  | 0.947 | 0.832 | 2.5 |
| <b>D5S818</b>   | 0.530                    | 0.111                  | 0.889 | 0.714 | 2.1  | 0.502                    | 0.131                  | 0.869 | 0.680 | 2.0 | 0.519                     | 0.105                  | 0.895 | 0.716 | 2.0 |
| <b>FGA</b>      | 0.805                    | 0.061                  | 0.939 | 0.868 | 5.3  | 0.730                    | 0.037                  | 0.963 | 0.862 | 3.8 | 0.519                     | 0.057                  | 0.943 | 0.826 | 2.0 |
| <b>Combined</b> | 0.99999929               | 5.12x10 <sup>-15</sup> |       |       |      | 0.99999927               | 5.12x10 <sup>-15</sup> |       |       |     | 0.99999227                | 1.14x10 <sup>-16</sup> |       |       |     |

N

O

P

| Locus           | Northwest District (n=260) |                        |       |       |     | Southeast District (n=32) |                        |       |       |     | Southern District (74) |                        |       |       |     |
|-----------------|----------------------------|------------------------|-------|-------|-----|---------------------------|------------------------|-------|-------|-----|------------------------|------------------------|-------|-------|-----|
|                 | PE                         | MP                     | PD    | PIC   | TPI | PE                        | MP                     | PD    | PIC   | TPI | PE                     | MP                     | PD    | PIC   | TPI |
| <b>D8S1179</b>  | 0.503                      | 0.079                  | 0.921 | 0.752 | 2.0 | 0.565                     | 0.129                  | 0.871 | 0.705 | 2.3 | 0.594                  | 0.098                  | 0.902 | 0.740 | 2.5 |
| <b>D21S11</b>   | 0.803                      | 0.024                  | 0.976 | 0.885 | 5.2 | 0.808                     | 0.057                  | 0.943 | 0.844 | 5.3 | 0.751                  | 0.042                  | 0.958 | 0.839 | 4.1 |
| <b>D7S820</b>   | 0.571                      | 0.086                  | 0.914 | 0.739 | 2.3 | 0.510                     | 0.098                  | 0.902 | 0.716 | 2.  | 0.569                  | 0.084                  | 0.916 | 0.753 | 2.3 |
| <b>CSF1PO</b>   | 0.471                      | 0.068                  | 0.932 | 0.763 | 1.8 | 0.510                     | 0.074                  | 0.926 | 0.782 | 2.0 | 0.476                  | 0.068                  | 0.932 | 0.782 | 1.9 |
| <b>D3S1358</b>  | 0.465                      | 0.119                  | 0.881 | 0.688 | 1.8 | 0.409                     | 0.162                  | 0.838 | 0.669 | 1.6 | 0.392                  | 0.123                  | 0.877 | 0.690 | 1.5 |
| <b>TH01</b>     | 0.440                      | 0.122                  | 0.878 | 0.678 | 1.7 | 0.364                     | 0.117                  | 0.883 | 0.688 | 1.5 | 0.698                  | 0.165                  | 0.835 | 0.677 | 3.4 |
| <b>D13S317</b>  | 0.371                      | 0.136                  | 0.864 | 0.653 | 1.5 | 0.409                     | 0.154                  | 0.846 | 0.654 | 1.6 | 0.521                  | 0.140                  | 0.860 | 0.664 | 2.1 |
| <b>D16S539</b>  | 0.550                      | 0.088                  | 0.912 | 0.739 | 2.2 | 0.622                     | 0.119                  | 0.881 | 0.734 | 2.7 | 0.454                  | 0.088                  | 0.912 | 0.753 | 1.8 |
| <b>D2S1338</b>  | 0.764                      | 0.024                  | 0.976 | 0.879 | 4.3 | 0.683                     | 0.059                  | 0.941 | 0.825 | 3.2 | 0.698                  | 0.044                  | 0.956 | 0.849 | 3.4 |
| <b>D19S433</b>  | 0.665                      | 0.043                  | 0.957 | 0.827 | 3.0 | 0.745                     | 0.066                  | 0.934 | 0.827 | 4.0 | 0.510                  | 0.112                  | 0.888 | 0.707 | 2.0 |
| <b>vWA</b>      | 0.471                      | 0.057                  | 0.943 | 0.791 | 1.8 | 0.683                     | 0.096                  | 0.904 | 0.756 | 3.2 | 0.454                  | 0.078                  | 0.922 | 0.767 | 1.8 |
| <b>TPOX</b>     | 0.578                      | 0.091                  | 0.909 | 0.740 | 2.4 | 0.364                     | 0.102                  | 0.898 | 0.709 | 1.5 | 0.594                  | 0.112                  | 0.888 | 0.711 | 2.5 |
| <b>D18S51</b>   | 0.725                      | 0.026                  | 0.974 | 0.871 | 3.7 | 0.683                     | 0.086                  | 0.914 | 0.848 | 3.2 | 0.862                  | 0.040                  | 0.960 | 0.869 | 7.4 |
| <b>D5S818</b>   | 0.440                      | 0.119                  | 0.881 | 0.683 | 1.7 | 0.565                     | 0.150                  | 0.850 | 0.675 | 2.3 | 0.372                  | 0.098                  | 0.902 | 0.716 | 1.5 |
| <b>FGA</b>      | 0.733                      | 0.032                  | 0.968 | 0.861 | 3.8 | 0.565                     | 0.061                  | 0.939 | 0.811 | 2.3 | 0.862                  | 0.043                  | 0.957 | 0.861 | 7.4 |
| <b>Combined</b> | 0.99999863                 | 1.02x10 <sup>-18</sup> |       |       |     | 0.99999835                | 5.56x10 <sup>-16</sup> |       |       |     | 0.999999666            | 4.25x10 <sup>-17</sup> |       |       |     |

**Supplementary Table S8** Population samples according to district and self-declared ethno-linguistic population group used in the study (n=990).

| <b>District</b>  | <b>n</b> | <b>Khoisan</b> | <b>Bantu</b> |
|------------------|----------|----------------|--------------|
| <b>Central</b>   | 264      | 9              | 255          |
| <b>Ghanzi</b>    | 168      | 156            | 12           |
| <b>Kgalagadi</b> | 20       | 6              | 14           |
| <b>Kgatleng</b>  | 21       | -              | 21           |
| <b>Kweneng</b>   | 106      | 1              | 105          |
| <b>Northeast</b> | 45       | -              | 45           |
| <b>Northwest</b> | 260      | 66             | 194          |
| <b>Southeast</b> | 32       | -              | 32           |
| <b>Southern</b>  | 74       | -              | 74           |
| <b>total</b>     | 990      | 238            | 752          |

**Supplementary Table S9** Population samples according to their self-declared Bantu and Khoisan ethno-linguistic population groups (n=990).

| <b>Language Family</b> | <b>Branch</b>                  | <b>Sub-group</b>       | <b>n</b> |
|------------------------|--------------------------------|------------------------|----------|
| <b>Niger-Congo</b>     | Narrow Bantu (Bantu)           | Central K <sup>1</sup> | 43       |
|                        |                                | Central R <sup>2</sup> | 58       |
|                        |                                | Central S <sup>3</sup> | 646      |
|                        |                                | Undeclared Bantu       | 5        |
| <b>Khoisan</b>         | Southern African Khoisan (SAK) | Khoe-Kwadi             | 133      |
|                        |                                | Kx'a                   | 58       |
|                        |                                | Tuu                    | 32       |
|                        |                                | Undeclared Khoisan     | 15       |

<sup>1</sup>Central K- Subiya, Mbukushu

<sup>2</sup>Central R- Yeyi

<sup>3</sup>Central S- Kgalagadi, Kalanga, Tswana (and its dialects-Barolong, Bakwena, Bangwaketse, Balete, Bakgatla, Barolong, Bangwato, and Batawana)
